# Supplementary material for: Combined analysis of dissimilar promoter accessibility and gene expression profiles identifies tissue-specific genes and actively repressed networks
Source: PubMed Central journal article supplement (PMC6385419; doi:10.1186/s13072-019-0260-2), 2019-02-22
Supplement: 13072_2019_260_MOESM1_ESM.pdf [file 13072_2019_260_MOESM1_ESM.pdf]

**TITLE:** Combined analysis of dissimilar promoter accessibility and gene expression profiles identifies tissue-specific genes and actively repressed networks

Rebekah R. Starks<sup>1,2</sup>, Anilisa Biswas<sup>1,3</sup>, Ashish Jain<sup>1,2</sup>, Geetu Tuteja<sup>1,2,3,\*</sup>

[rstarks1@iastate.edu](mailto:rstarks1@iastate.edu), [anilisa@iastate.edu](mailto:anilisa@iastate.edu), [jain@iastate.edu](mailto:jain@iastate.edu), [geetu@iastate.edu](mailto:geetu@iastate.edu)

<sup>1</sup> Genetics, Development, and Cell Biology, Iowa State University, Ames, IA, 50011, USA

<sup>2</sup> Bioinformatics and Computational Biology, Iowa State University, Ames, IA, 50011, USA

<sup>3</sup> Molecular, Cellular, and Developmental Biology, Iowa State University, Ames, IA, 50011, USA

\*Corresponding author

Geetu Tuteja: [geetu@iastate.edu](mailto:geetu@iastate.edu)

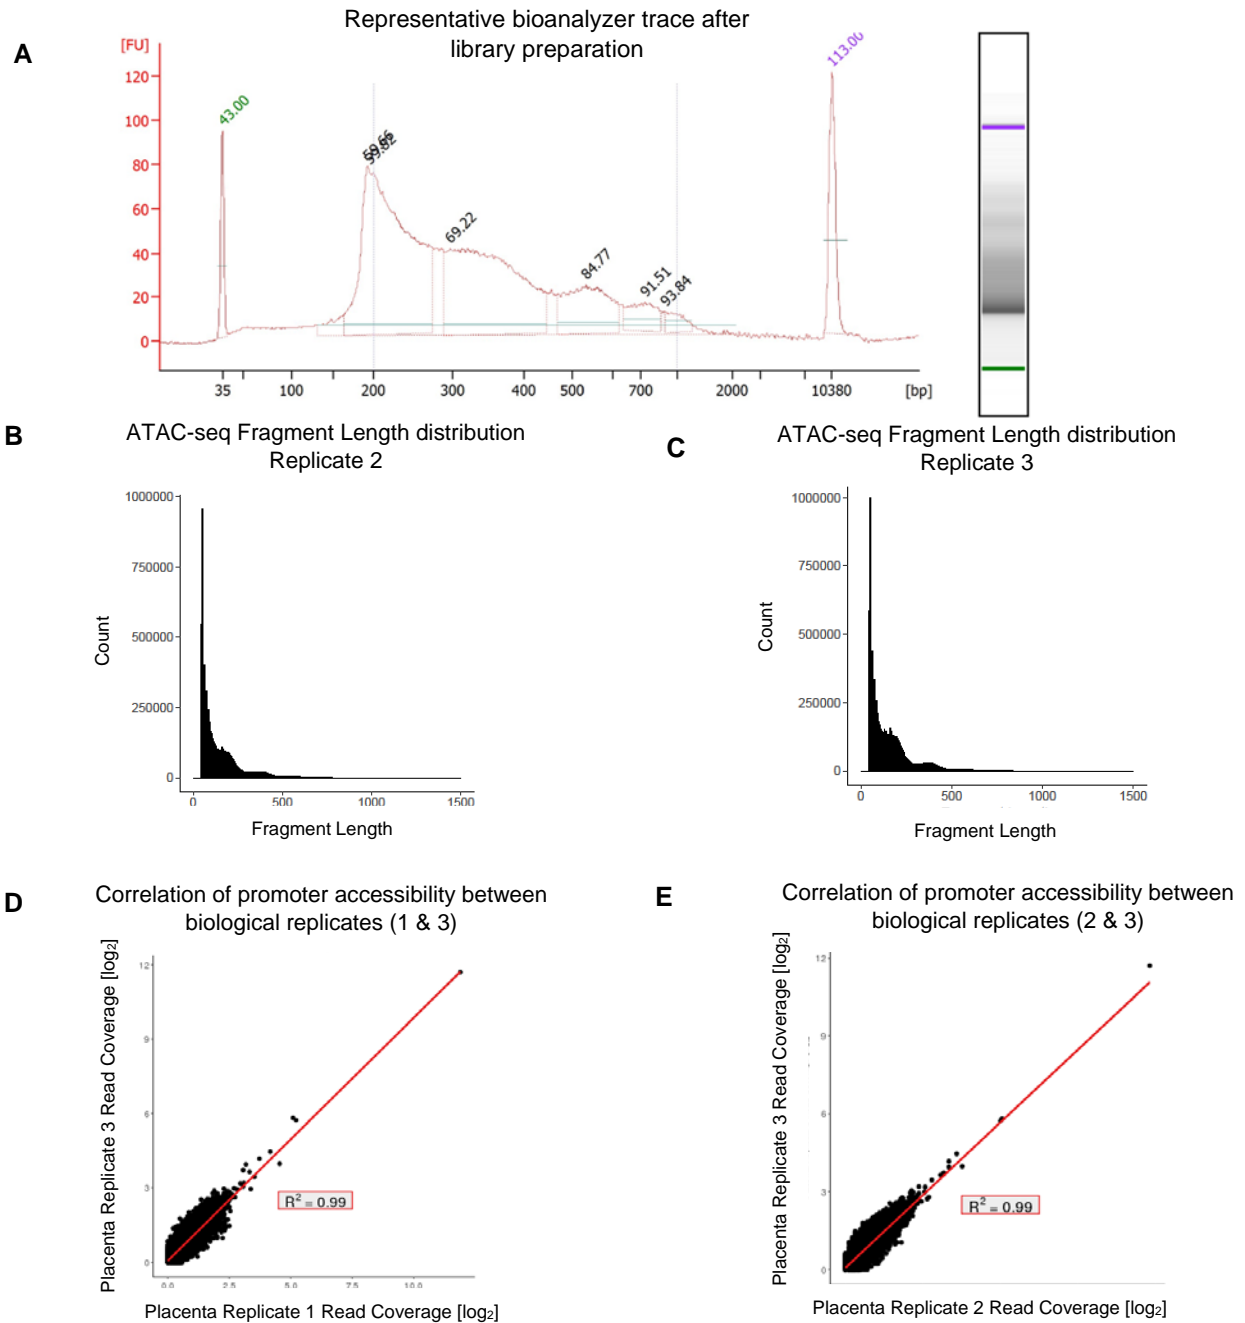

**Figure S1. ATAC-seq on whole tissues shows expected periodicity and correlations. (A)** Representative bioanalyzer trace for an e9.5 ATAC-seq library prior to sequencing. Clear and even periodicity can be seen in the trace. **(B,C)** Histogram of fragment sizes for replicate 2 and replicate 3, showing expected periodicity. **(D,E)** Scatterplot comparing promoter accessibility between biological replicates. Pearson correlation is high between all replicates.

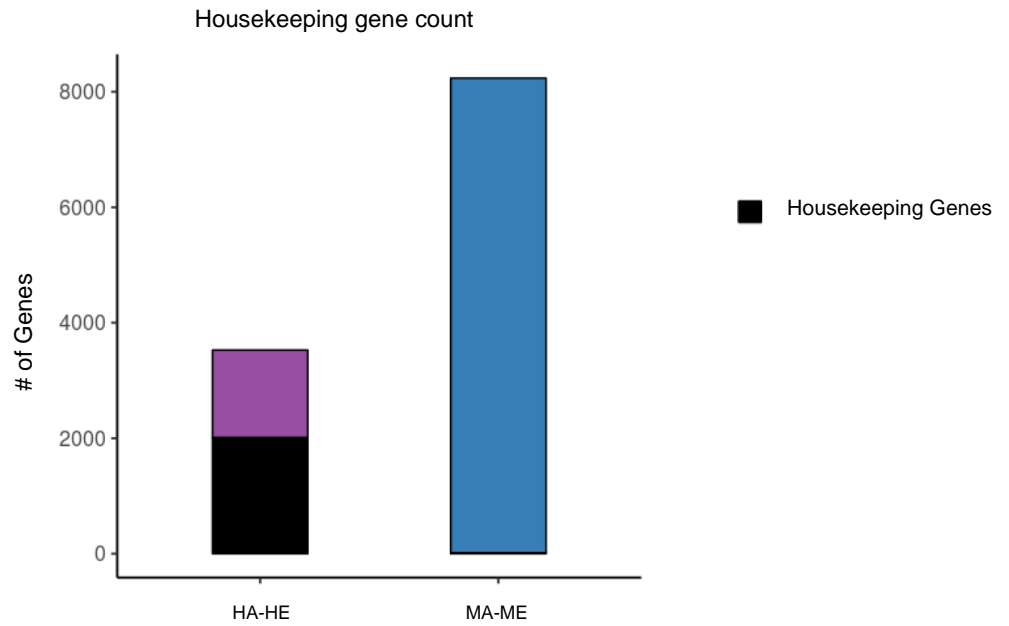

**Figure S2. The HA-HE group contains a large number of housekeeping genes.** The bar graph shows the number of genes in the MA-ME group and the HA-HE group that are considered housekeeping according to Bin Li et al. (2017) (black bar) and the total number of genes in each group (black bar + colored bar).

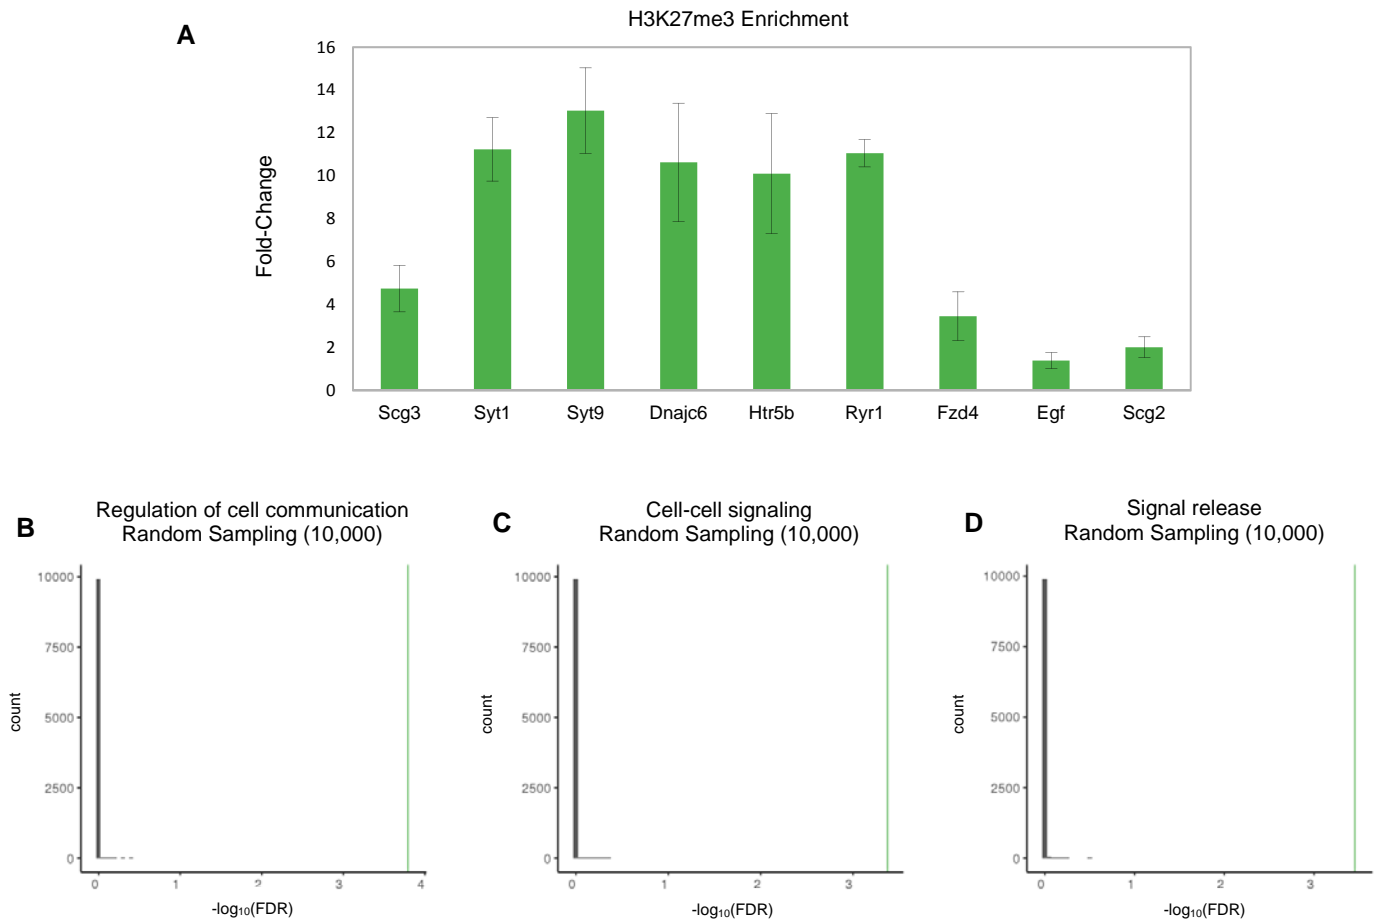

**Figure S3. The HA-ME group is marked by H3K27me3 and is associated with neuronal functions.** (A) H3K27me3 ChIP-enrichment relative to Gapdh in promoters of HA-ME genes. Bar plot shows mean enrichment of the nine tested genes, error bars indicate standard deviation. ChIP was performed for 3 biological replicates. (B-D) Bar plots representing the  $-\log_{10}(\text{FDR})$  of the specified term from random subgroups of HA-ME genes. The green line denotes the  $-\log_{10}(\text{FDR})$  of the term in the subnetwork from Figure 3C in the main manuscript.



**Figure S4. The MA-HE group is enriched for tissue-specific genes.** (A) Representative genes from the MA-HE group. ATAC-seq track, displayed in red, shows low accessibility. (B-D) Bar plots representing the  $-\log_{10}$  (FDR) of the specified term from random subgroups of HA-HE genes. The orange line denotes the  $-\log_{10}$  (FDR) of the terms in the MA-HE group. (E) Recon score distribution for 250 randomly chosen genes from each of the four groups (left). Recon score distribution for the entire HA-HE and MA-HE groups (middle). MA-HE genes have significantly higher nucleosome positioning scores than HA-HE (middle; \*\*\*\*\*) represents p-value  $< 0.0001$ , Mann-Whitney U test). NuScore deformation energy for all of the genes in all of the groups (right). MA-HE genes have a higher deformation energy than HA-HE genes. (F) MA-HE gene cluster identified by the GLay community clustering algorithm. Color intensity represents number of edges.

| Tissue / Cells | Correlation | Scatterplot                                                                          |
|----------------|-------------|--------------------------------------------------------------------------------------|
| Alpha          | 0.796       | 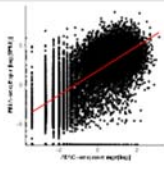   |
| Beta           | 0.767       |    |
| ESC            | 0.658       |    |
| HSC            | 0.777       |    |
| Neuron         | 0.751       |   |
| Retina         | 0.799       |  |
| Spleen         | 0.779       |  |
| TSC            | 0.738       |  |

**Figure S5. ATAC-seq and RNA-seq show high correlation in all tested cell types.** Spearman correlations (column 2) between promoter accessibility and RNA-seq TPM are high in all cell types. The corresponding scatterplot with the linear regression line is shown in column 3.

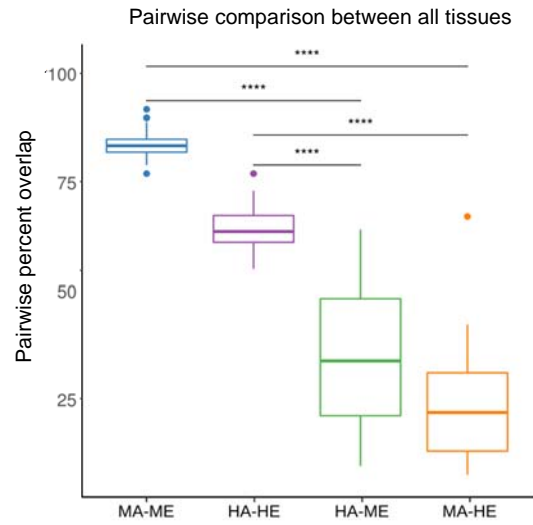

**Figure S6. Pairwise comparison of genes in each group for all tissues.** Boxplots illustrate the distribution of pairwise percent overlap of genes between all pairs of tissues for each group (\*\*\*\* = p-value < 0.0001, Mann-Whitney U test).



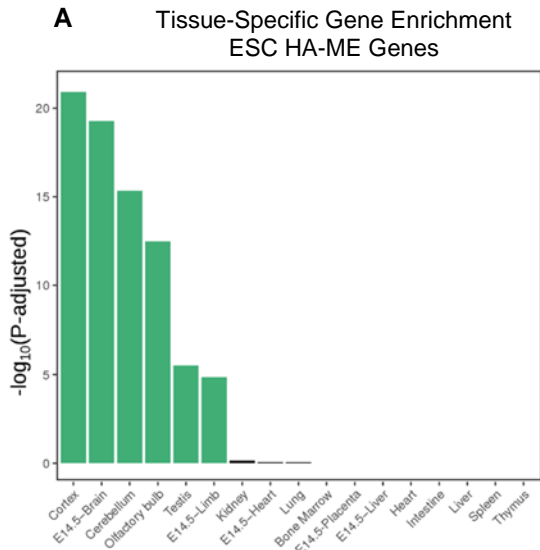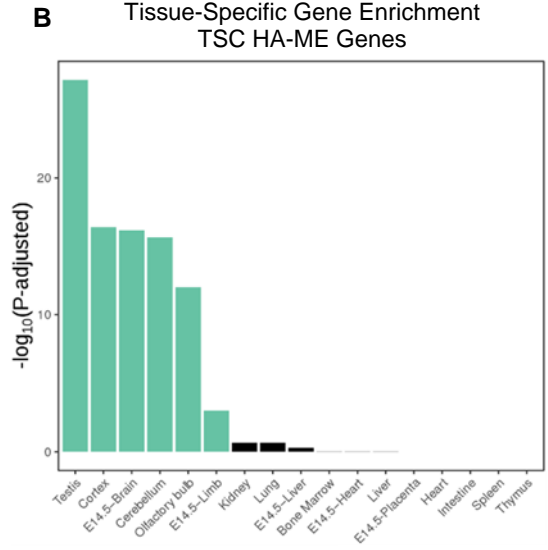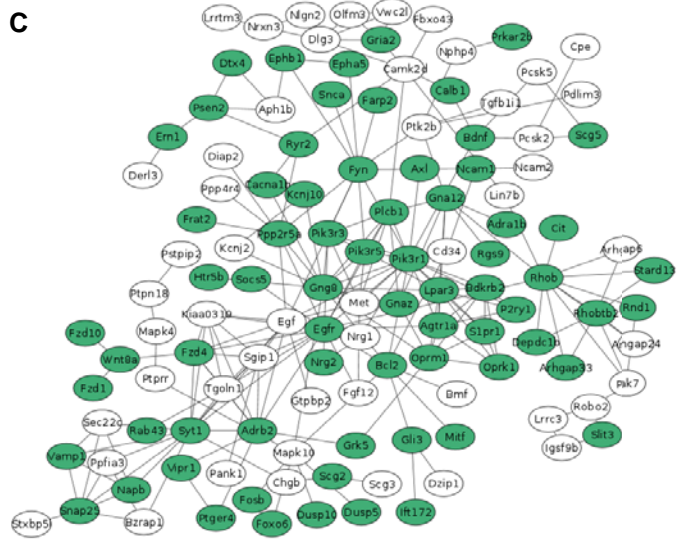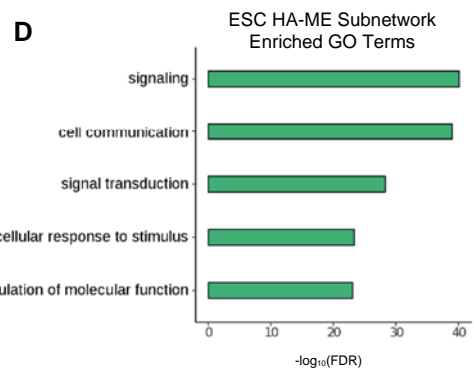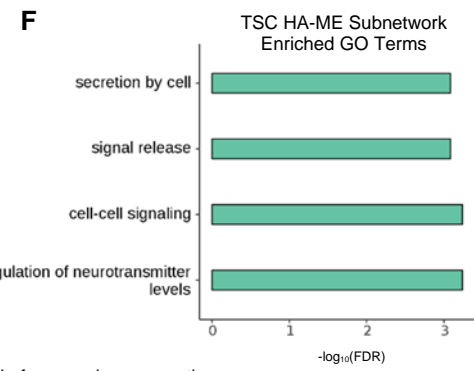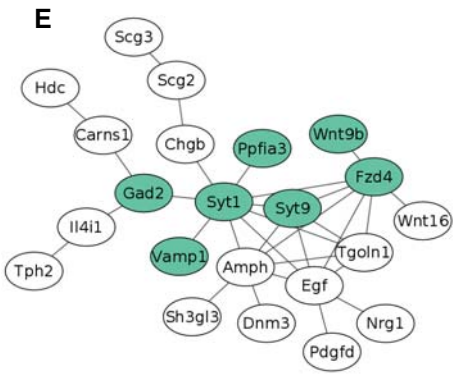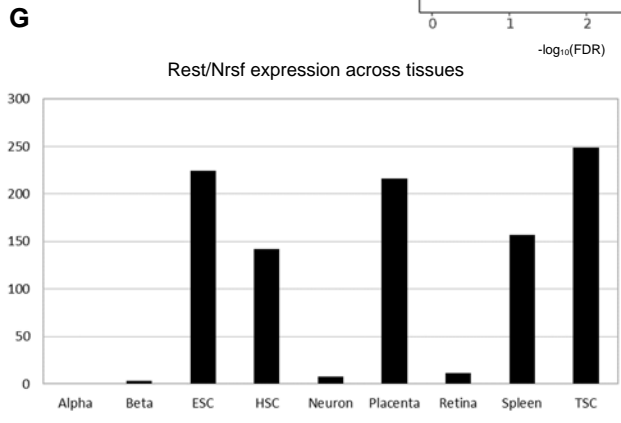

**Figure S7. HA-ME genes in ESC and TSC have potentially repressed neuronal networks.** (A) Tissue-specific gene enrichment analysis showing that the ESC HA-ME group is enriched for genes specifically expressed in multiple tissues, including the brain (E14.5 brain, olfactory bulb, cerebellum, and cortex). Colored bars correspond to tissues with an adjusted p-value  $\leq 0.01$ . (B) Tissue-specific gene enrichment analysis showing that the TSC HA-ME group is enriched for genes specifically expressed in multiple tissues, including the brain (E14.5 brain, olfactory bulb, cerebellum, and cortex). Colored bars correspond to tissues with an adjusted p-value  $\leq 0.01$ . (C) PPI network obtained from genes in the ESC HA-ME group. Colored nodes represent genes related to the GO terms in (D). (D) Bar plot of the enriched GO biological process terms for the subnetwork from (C). Enriched terms are related to neuronal functions. (E) PPI network obtained from genes in the TSC HA-ME group. Colored nodes represent genes related to the GO terms in (F). (F) Bar plot of the enriched GO biological process terms, from STRING, for the subnetwork from (E). Enriched terms are related to neuronal functions. (G) Rest/Nrsf expression in all datasets. Rest/Nrsf expression is high in tissues without neuronal function.

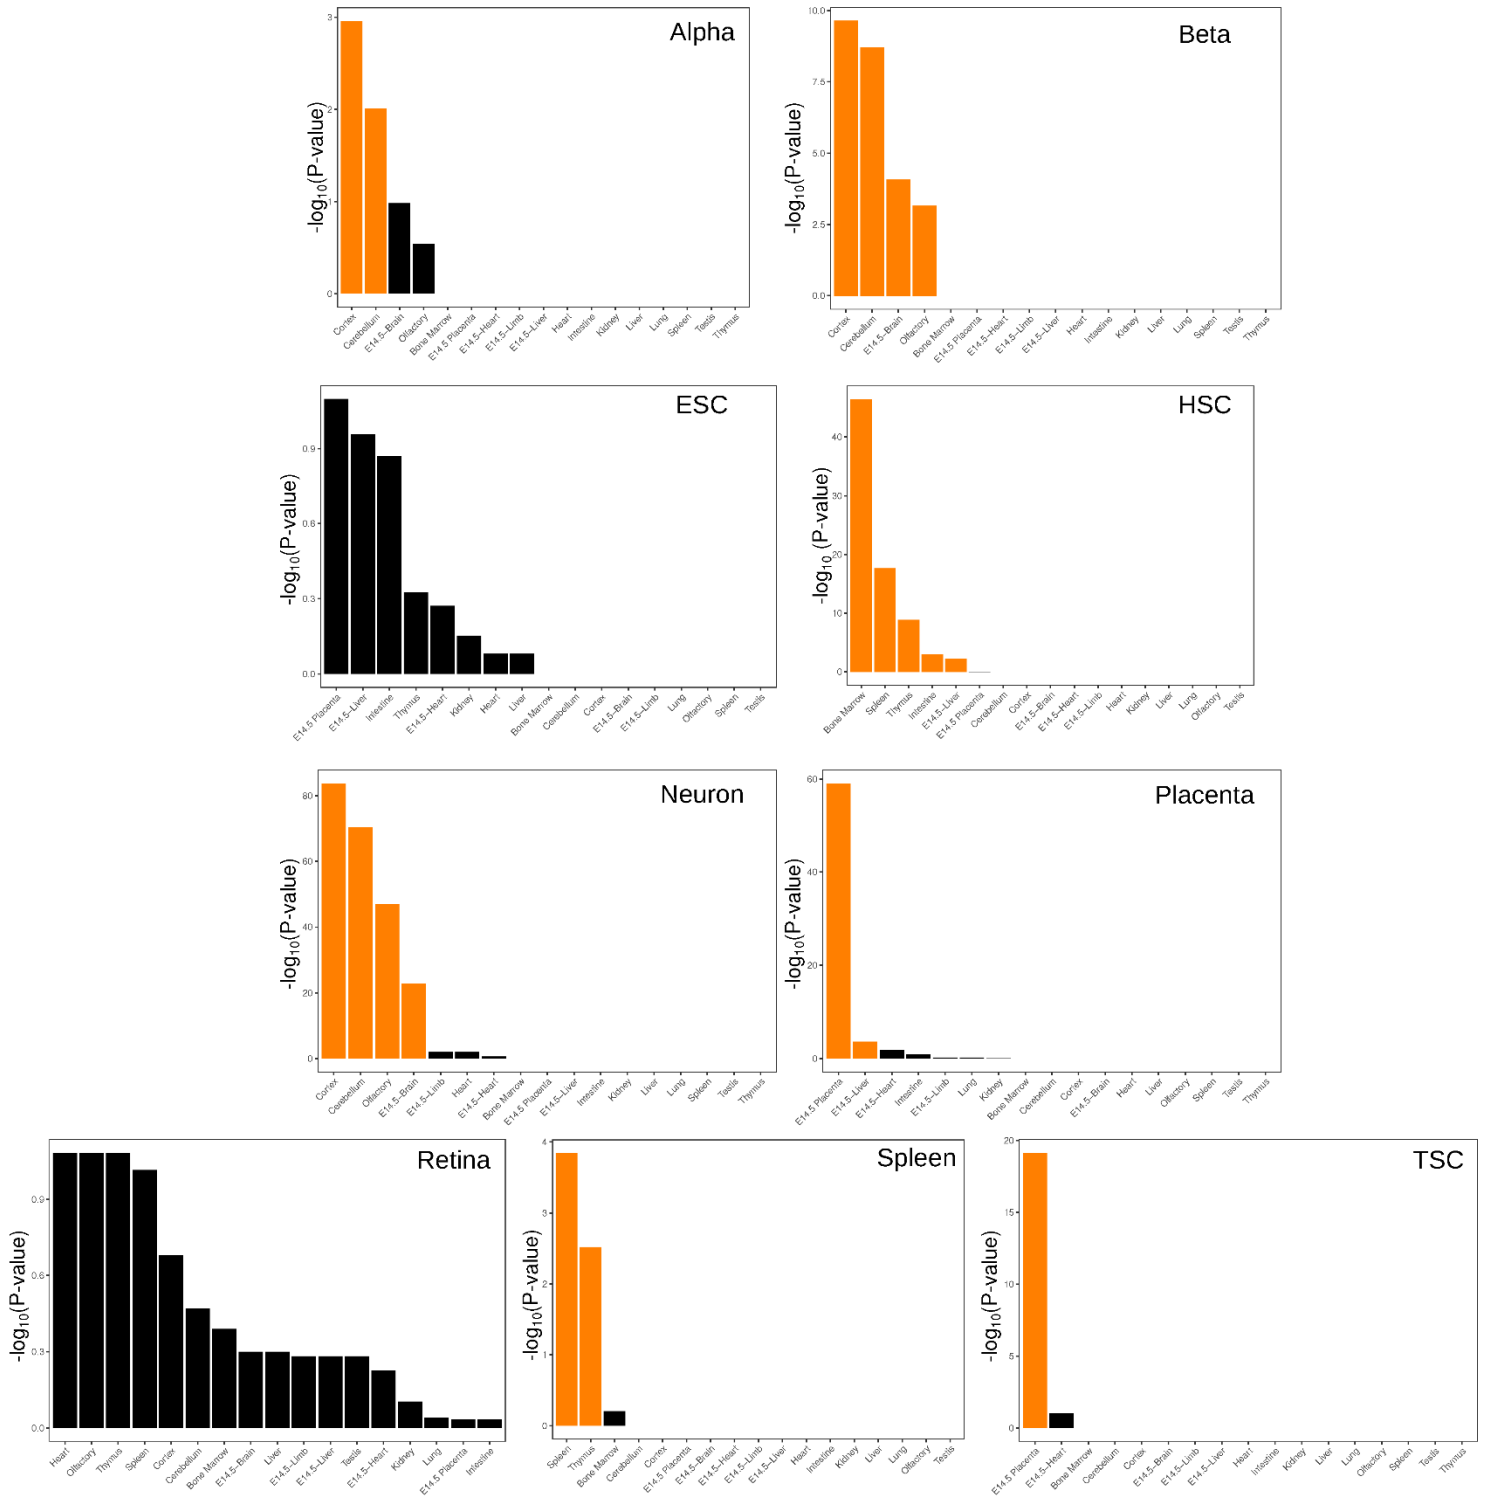

**Figure S8. Tissue-specific gene expression in MA-HE groups.** Tissue-specific gene enrichment analysis for the MA-HE group of each tissue showing that for most tissues, there is an enrichment of genes specifically expressed in those tissues. Retina and pancreatic cell data are not part of the mouse Encode data, which was used for tissue-specific gene enrichment analysis. Colored bars correspond to tissues with an adjusted p-value  $\leq 0.01$ .

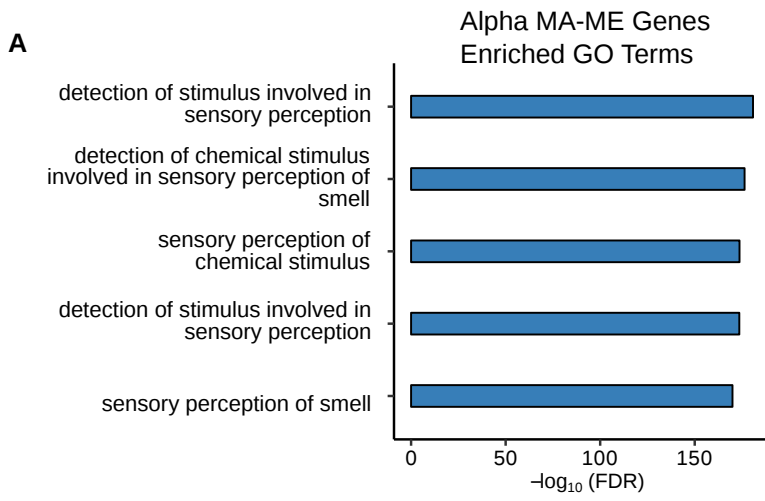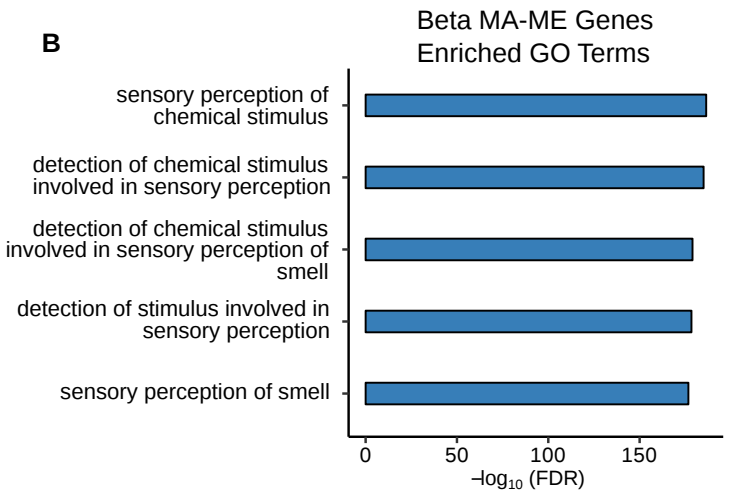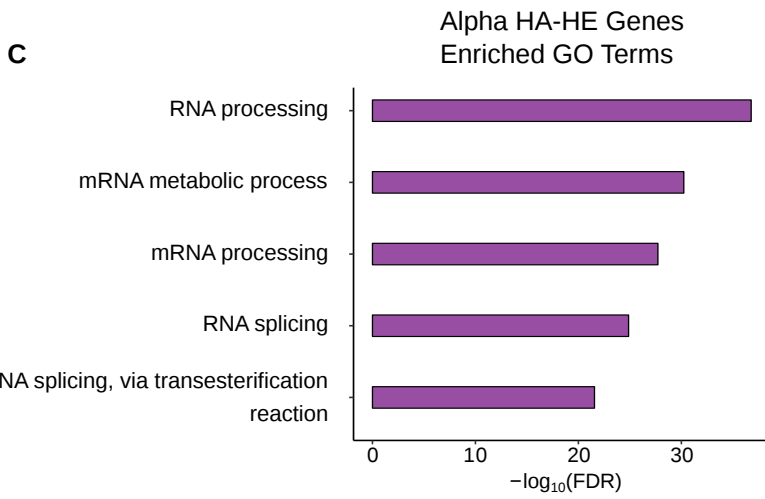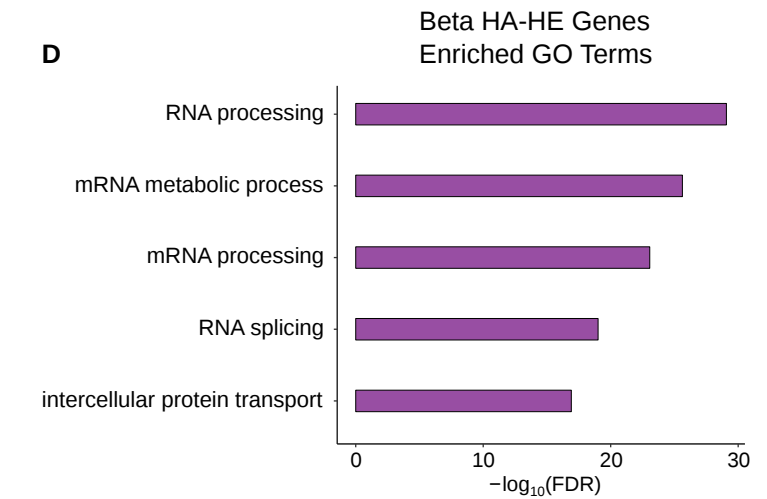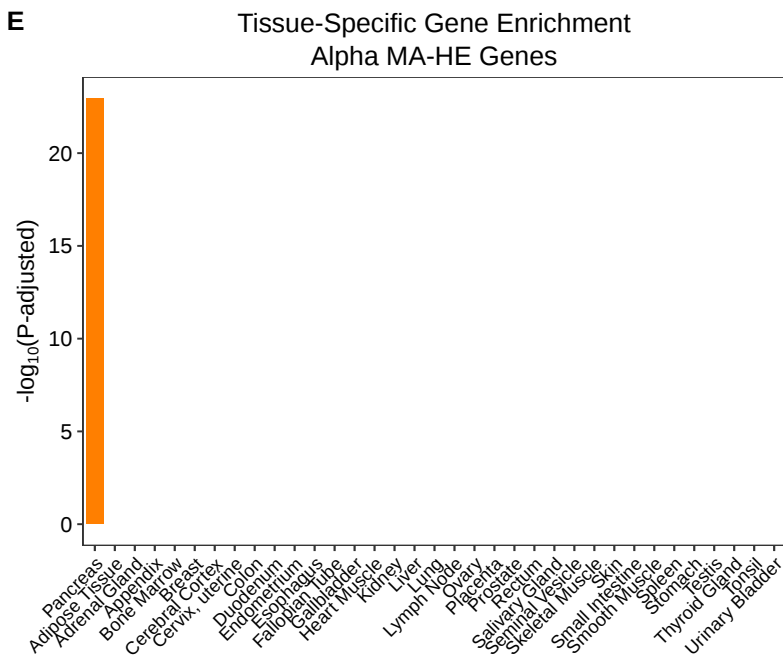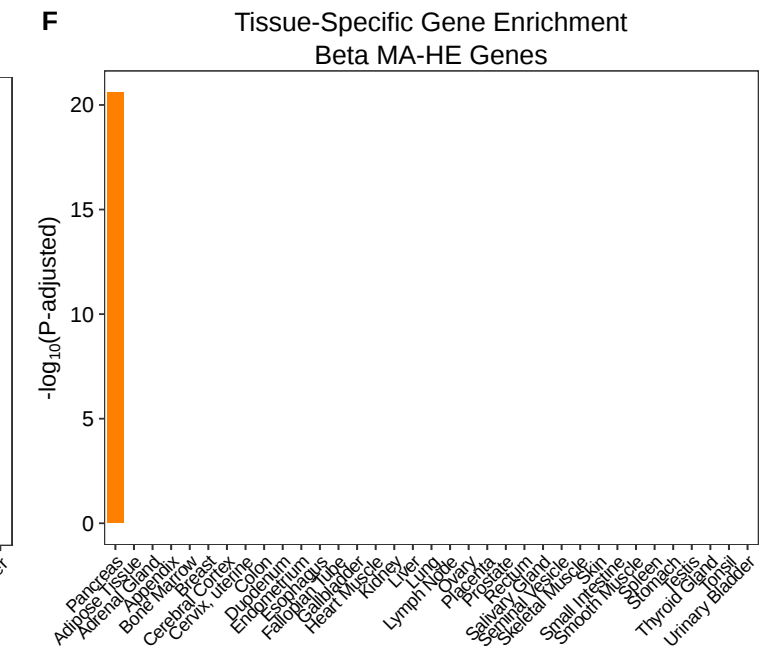

**Figure S9. Group analysis of human alpha and beta cells.** (A,B) Genes in the MA-ME group of human alpha and beta cells are enriched for biological processes related to sensory perception. (C,D) Genes in the HA-HE group of human alpha and beta cells are enriched for biological processes related to housekeeping functions. (E,F) Tissue-specific gene enrichment analysis shows enrichment of pancreas-specific genes in the MA-HE group for both alpha and beta cells. Colored bars correspond to tissues with an adjusted p-value  $\leq 0.01$ .
